# Supplementary material
Source: PubMed Central journal article supplement (PMC4061158)

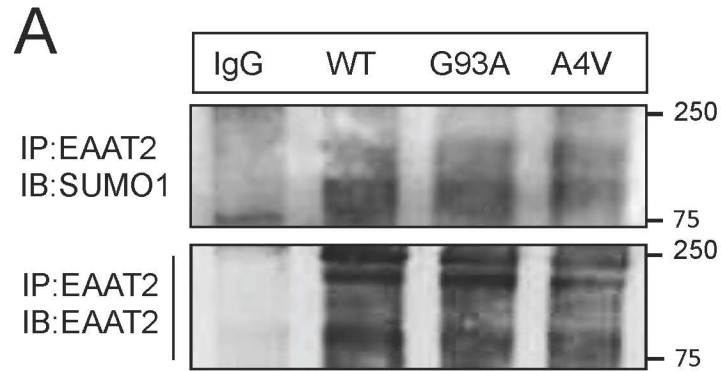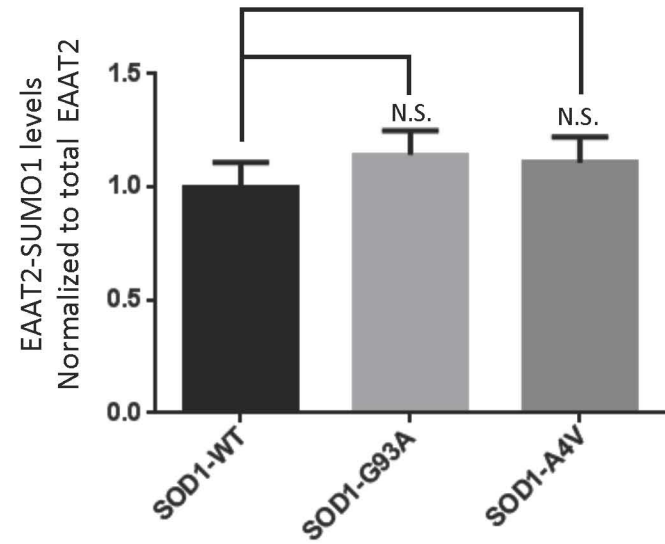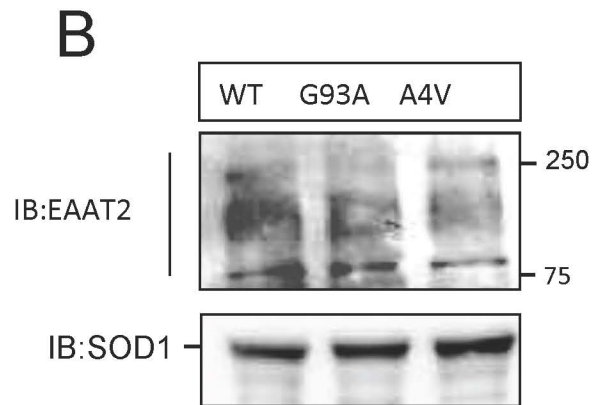

Suppl.Fig.1

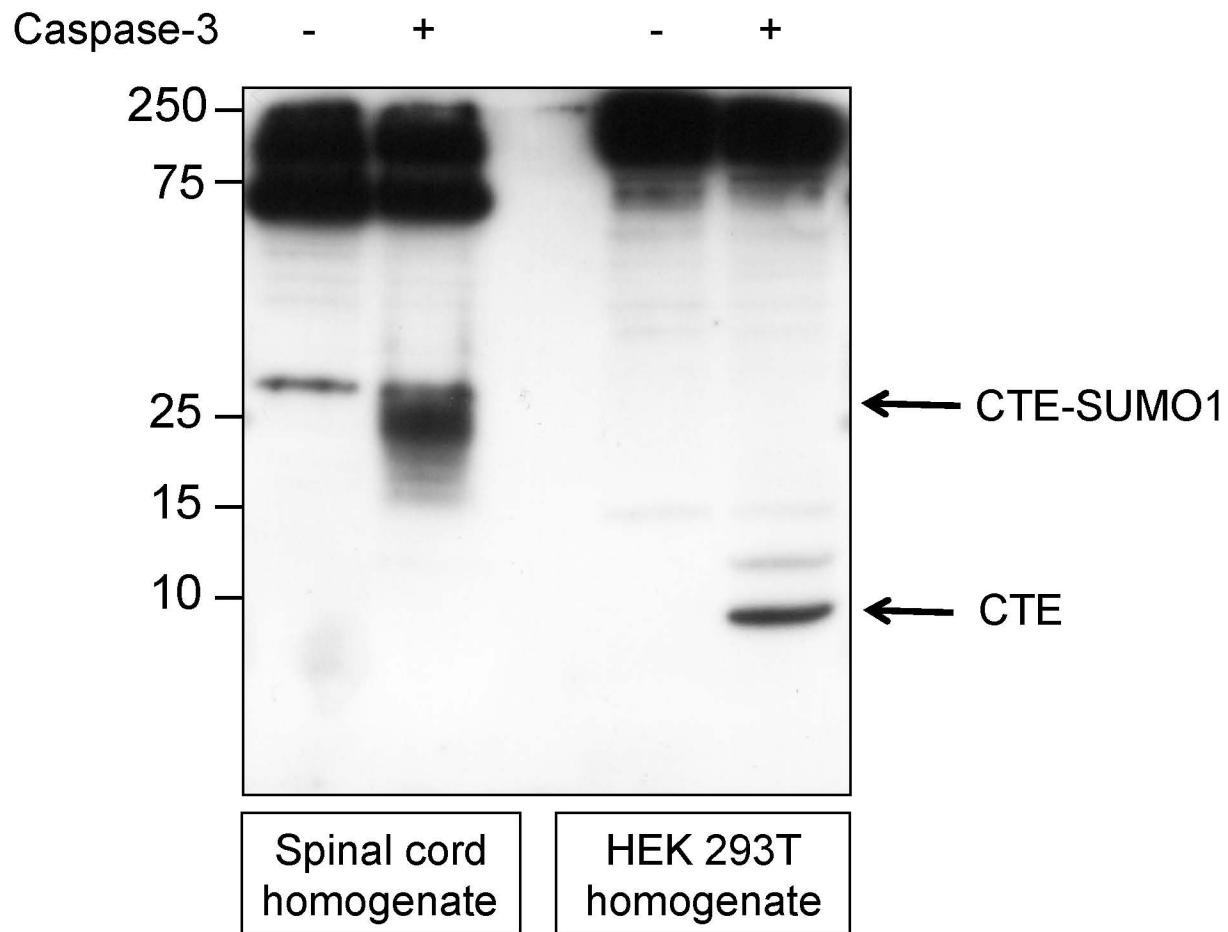

IB:ABR 518-536

Suppl.Fig.2

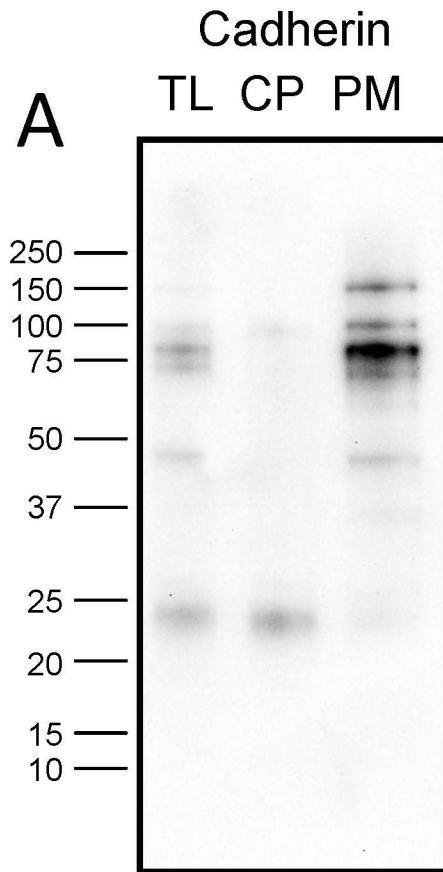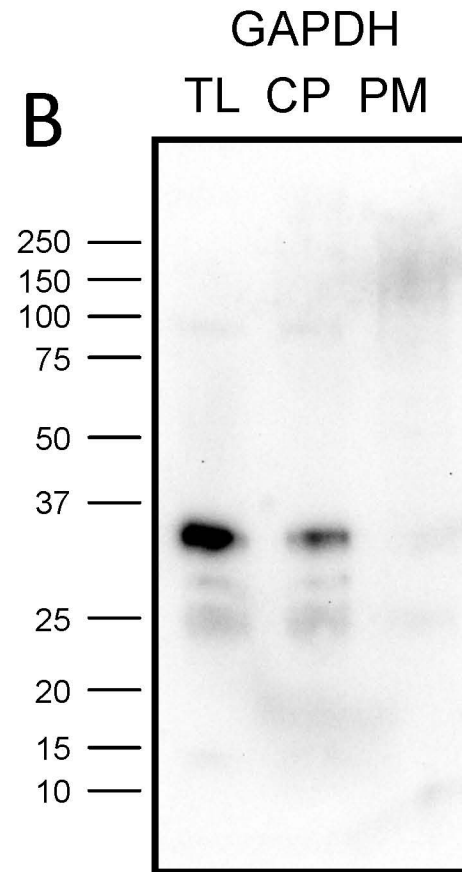

Suppl.Fig.3

Supplement: NIHMS583306-supplement-Supp_FigureS1-S3.pdf [file NIHMS583306-supplement-Supp_FigureS1-S3.pdf]
